# Supplementary material for: How Much Recurrent Outbreaks of the Moon Jellyfish May Impact the Dynamics of Bacterial Assemblages in Coastal Lagoons?
Source: MDPI journal article supplement (doi:10.3390/w14233908), 2022-12-01
Supplement: s1 [file s1]

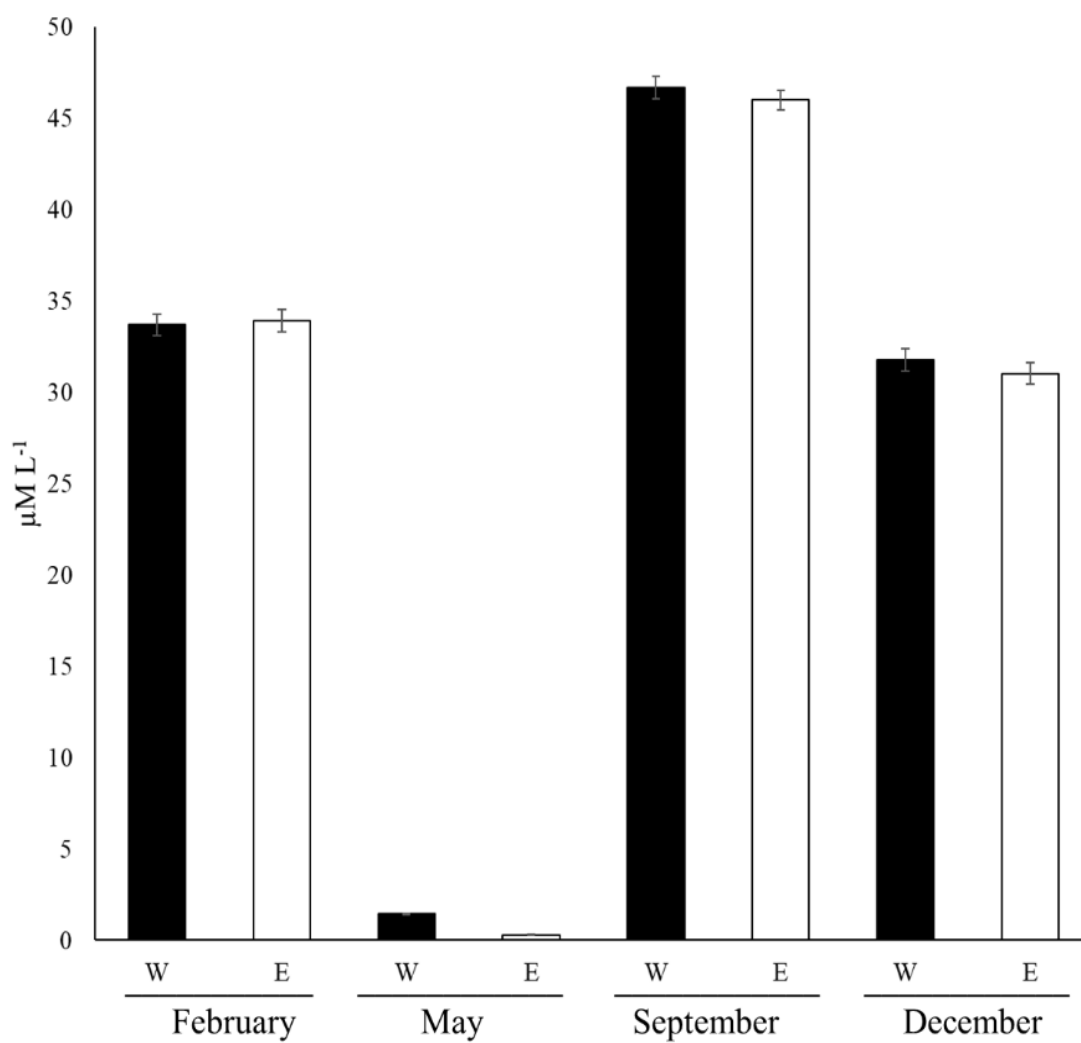

**Figure S1.** The silicates characterizing the water column of the W and E zones during the sampling times.

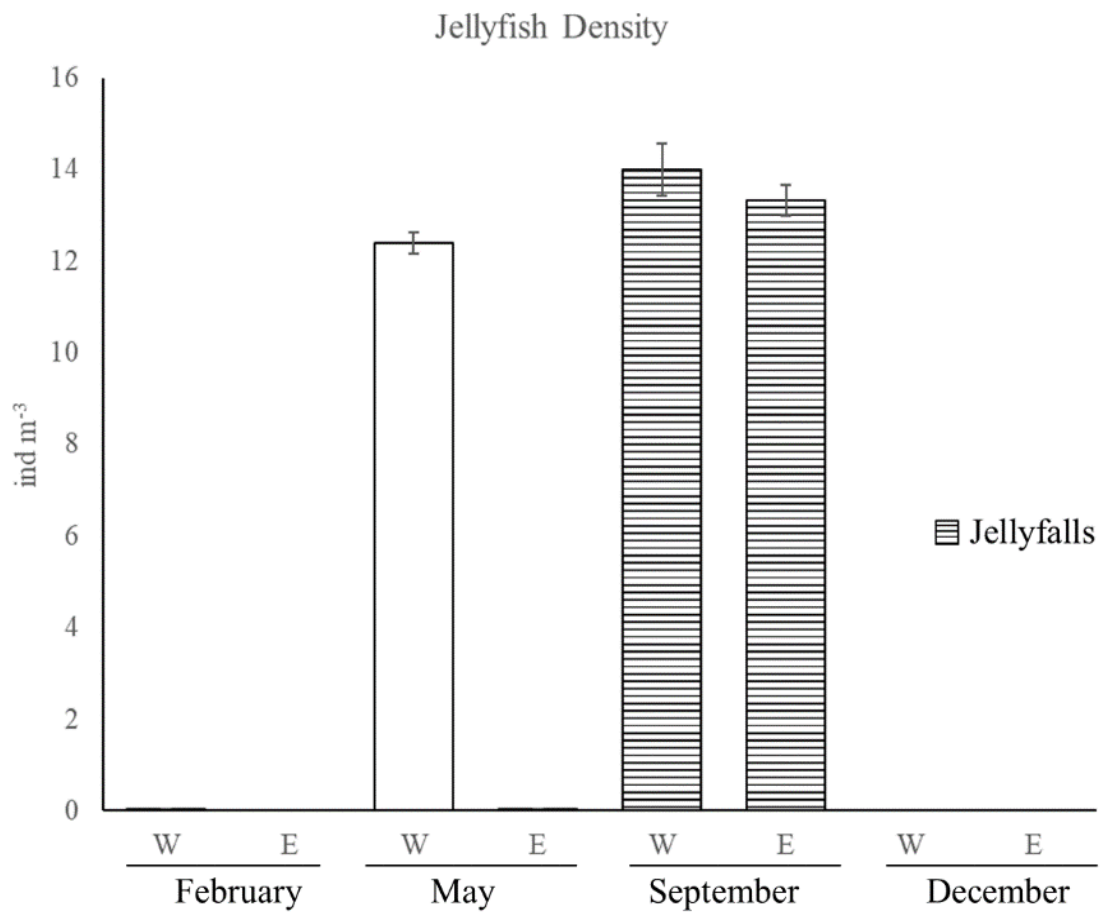

**Figure S2.** Density of *Aurelia coerulea* or jelly-falls in the W and E, zones during the sampling times.

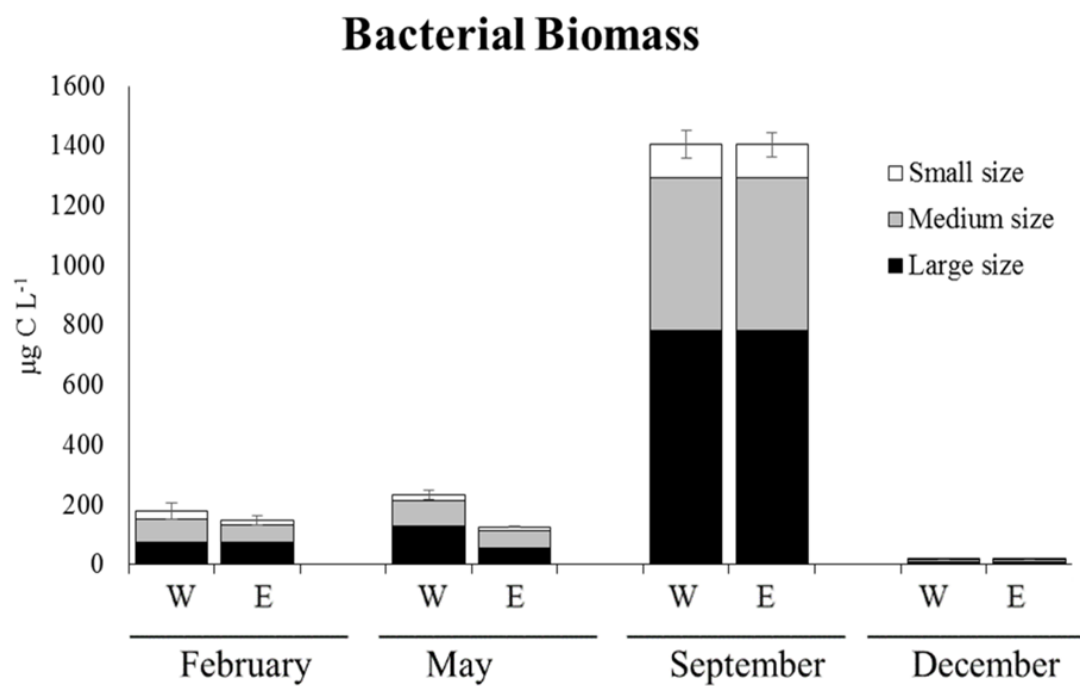

**Figure S3.** Bacterial biomass and size composition in the seawater of the W and E zones during the sampling times.

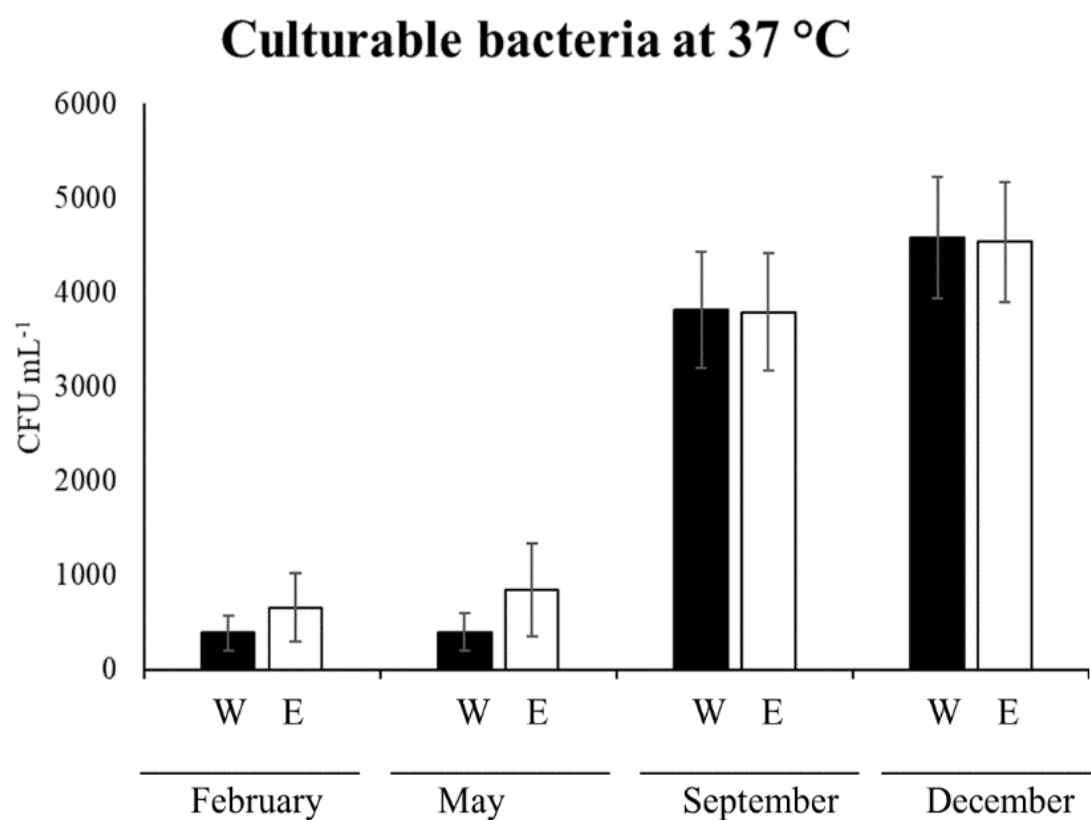

**Figure S4.** Culturable bacteria (at 37 °C) in W and E zones during the sampling times.

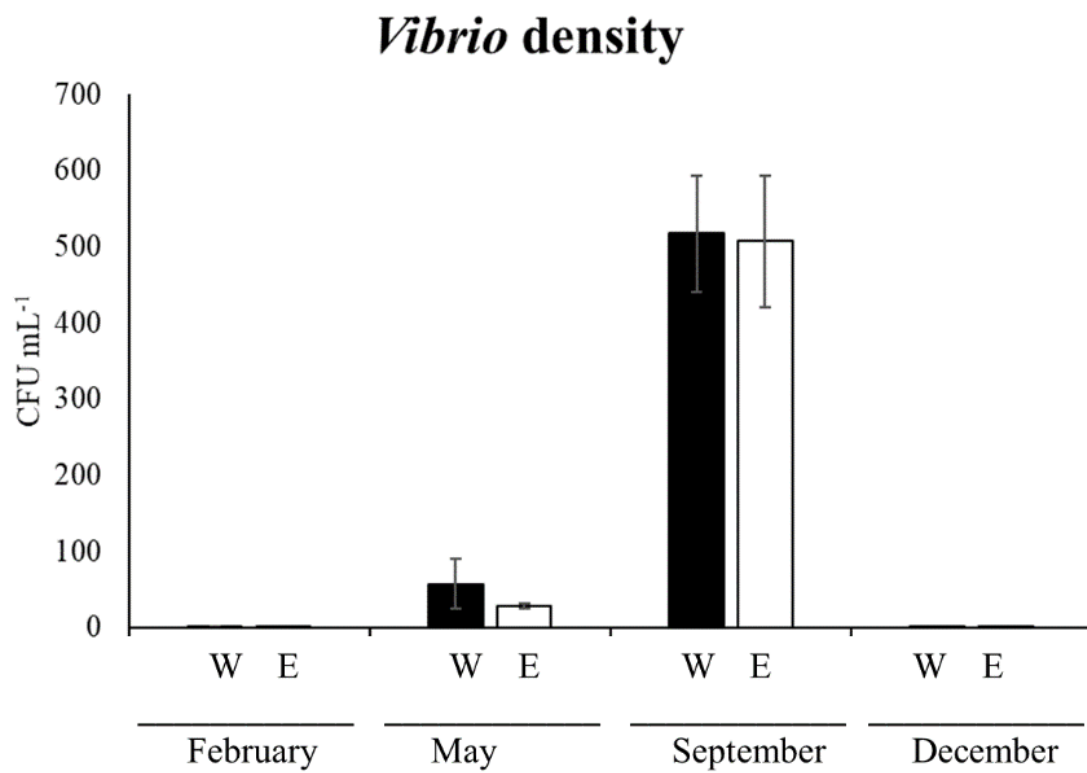

**Figure S5.** *Vibrio* density in seawater column of W and E zones during the sampling times.

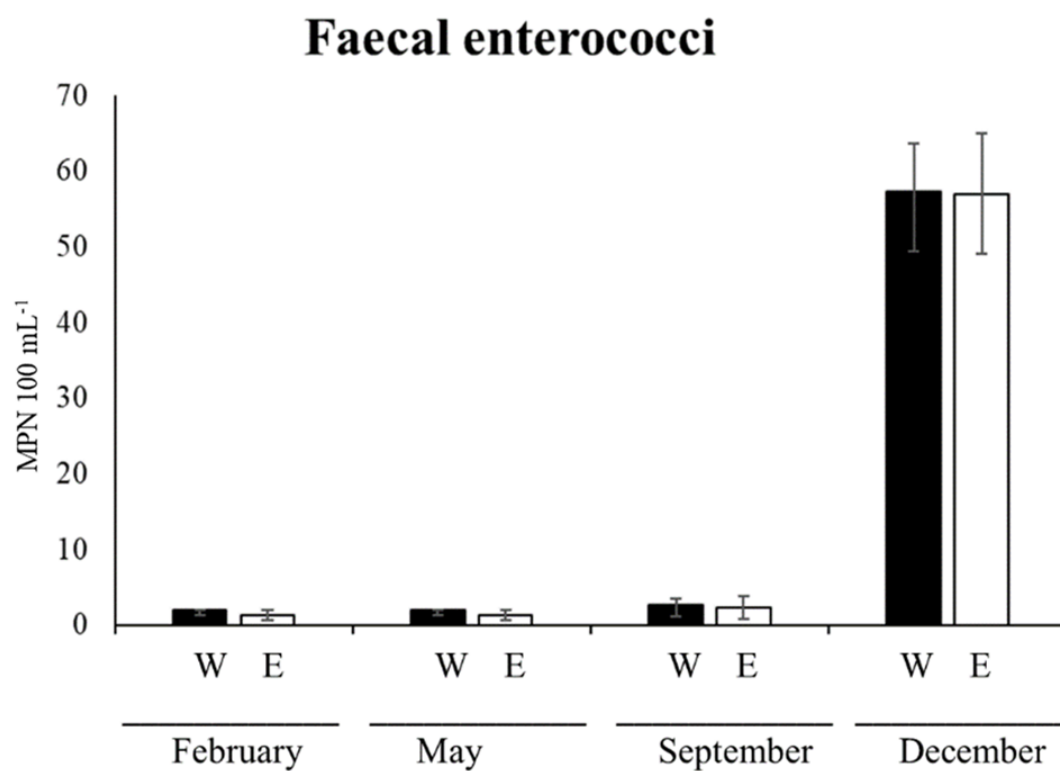

**Figure S6.** Faecal enterococci in seawater column of W and E zones during the sampling times.
